# Supplementary material
Source: Springer Nature journal article supplement (https://www.springermedizin.de/resource/supplementary/12904_2013_185_MOESM1_ESM.pdf/9517732)
Supplement: MOESM1 [file 9517732]

**Additional file 1:**

*Search strategy: PubMed*

(((((((((("Withholding Treatment"[Mesh])) OR ("Treatment Refusal"[Mesh])) OR ("Right to die"[Mesh])) OR ("Euthanasia, Passive"[Mesh])) OR ("Suicide, assisted"[Mesh])) OR ("Euthanasia, Active, Voluntary"[Mesh])) OR (hasten death)) OR (desire to die))) AND ((((((((((("Fasting"[Mesh])) OR ("Eating"[Mesh])) OR ("Drinking"[Mesh])) OR ("stopping eating and drinking")) OR ("refusal of food and fluids")) OR (nutrition)) OR (hydration)) OR (food)) AND (Humans[Mesh]))
